# Supplementary material
Source: PubMed Central journal article supplement (PMC3406876)
Supplement: 1207550109_pnas.1207550109_SI.pdf [file 1207550109_pnas.1207550109_SI.pdf]

# Supporting Information

Amini et al. 10.1073/pnas.1207550109

## SI Text

**Inertial Focusing of Particles and the Required Channel Length.** In regards to the behavior of the particle itself, with a combination of confinement and inertia, it has been shown that a particle flowing downstream migrates across streamlines and focuses to a lateral dynamic equilibrium position that corresponds to channel symmetry (1). This inertial focusing is due to a balance between (i) a wall effect lift force, which acts to drive the particle towards the channel center, and (ii) inertial lift due to the shear gradient present in a Poiseuille flow that tends to drive the particle towards the channel wall. As a consequence, particles flowing in rectangular channels will focus to positions about halfway between the center and wall of the channel (1). It is worth noting that at large  $H/a$  ( $> \sim 10$ ) particles are able to form trains at multiple locations across the channel (2, 3). However, for the rectangular channels that we make use of here, particles normally focus to two streamlines centered on the long faces of the channel (4), which is further decreased to one focusing position by introducing particles from only one of the two inlets (5). An expression that gives the length required for particles to reach their focusing position ( $L_f$ ) has been proposed that depends on fluid properties, flow velocity, particle size, and channel geometry (6). For a flow containing 10  $\mu\text{m}$  particles in a  $40 \times 60 \mu\text{m}$  channel at 100  $\mu\text{L}/\text{min}$ ,  $L_f$  is on the order of a few millimeters. Therefore, in a channel exceeding this length, we can assume that particles stably translate downstream at focusing positions, experiencing a steady rotational motion due to the velocity differences across them.

**Microfabrication.** Microfluidic devices were fabricated using polydimethylsiloxane (PDMS) replica molding processes. Standard lithographic techniques were used to produce a mold from a silicon master spin-coated with SU-8 photoresist (MicroChem Corp.). PDMS chips were produced from this mold using Sylgard 184 Elastomer Kit (Dow Corning Corporation). Inlet and outlet holes were punched through PDMS using a pin vise (Technical Innovations, Inc.). PDMS and glass were activated by air plasma (Plasma Cleaner, Harrick Plasma) and bonded together to enclose the channels.

**Beads and Dyes Suspensions.** Fluorescent monodisperse (10  $\mu\text{m}$ , 1.05 g/mL) and nonfluorescent polydisperse particles (11  $\mu\text{m}$ , 1.05 g/mL) were purchased from Duke Scientific. Particles were mixed to the desired length fraction by dilution in deionized water, from  $\phi = 0$  to 55%, for wt/vol % varying between 0.1% and 2.5%. To help visualization, the fluid stream can be mixed with fluorescein (1 mM in deionized water) or with blue food dye. Particle suspensions were pumped into the devices through Polyether ether ketone tubing (Upchurch Scientific Product No. 1569) using a syringe pump (Harvard Apparatus PHD 2000), for flow rates ranging from 5 to 300  $\mu\text{L}/\text{min}$ .

**Cell Suspensions and Blood.** HeLa cells cultured in RPMI medium 1640 with 10% FBS were trypsinized and resuspended in Phosphate Buffered Saline (PBS) before use, to achieve  $\phi = 4\%$ , 25%, and 33% assuming an average diameter of 15  $\mu\text{m}$ . Blood was collected from healthy volunteers in BD Vacutainer tubes by a trained phlebotomist and diluted with PBS with various factors of dilution (50X, 20X, and 10X). To facilitate white blood cell extraction, red cells were selectively lysed (eBiosciences, 1X RBC Lysis Buffer) and removed after serial centrifugations. White blood cells were resuspended in PBS before use, to  $\phi = 35\%$  assuming an average diameter of 12  $\mu\text{m}$ .

**Imaging and Transfer Characterization.** Fluorescent images were recorded using a Photometrics CoolSNAP HQ2 CCD camera mounted on a Nikon Eclipse Ti microscope. Images were captured with Nikon NIS-Elements AR 3.0 software. Based on these images, the intensity profile of a given channel cross-section can be drawn. The corresponding extent of transverse transport is characterized by transport factor ( $TF$ ), defined as  $2 \times (\Delta H/w - 0.5)$ , with  $\Delta H/w$  the extent of the channel cross-section whose intensity is greater than critical intensity ( $I_c = 0.2(I_{\text{max}} - I_{\text{min}}) + I_{\text{min}}$ ) (Fig. S6). Based on the cross-sectional intensity profile, transport factor ( $TF$ ) is calculated, which ranges from 0 to 1 where 0 and 1, respectively, correspond to zero and full transfer (homogenous distribution of the fluorescent dye on the cross-section of the channel). Confocal imaging was performed at the California NanoSystems Institute (CNSI) using a Leica inverted SP1 confocal microscope. Confocal images are the average of eight  $y$ - $z$  scans. For high-precision observations and measurements, some sequences were also recorded using a Phantom v7.3 high-speed camera (Vision Research Inc.) and Phantom Camera Control software.

**Integration of Fluid Switching and Mixing Around Beads and Cells.** Particle/cell suspensions were coflowed with a PBS washing buffer labeled with 250  $\mu\text{M}$  fluorescein, respectively, at the  $Q_P$  and  $Q_B$  flow rates.  $L$  cm downstream, particle-/cell-containing solution was collected in one of two or more outlets configured to take only a subfraction of the total liquid flow. The subfraction of solution without particles was also obtained (Fig. S10A). For each outlet and each flow rate, fluorescence intensity is measured with a plate reader (Tecan) and converted to an exchange percentage (exchange %) defined by a calibration curve obtained with serial dilutions of the fluorescent washing buffer. This parameter represents the proportion of fluorescent buffer stream transferred into the particle-laden collected fraction. Similarly, we define the contamination % as the concentration of particles contaminating the buffer outlet compared to the initial concentration of the particle suspension.

1. Di Carlo D, Irimia D, Tompkins RG, Toner M (2007) Continuous inertial focusing, ordering, and separation of particles in microchannels. *Proc Natl Acad Sci USA* 104:18892–18897.
2. Humphry KJ, Kulkarni PM, Weitz DA, Morris JF, Stone HA (2010) Axial and lateral particle ordering in finite Reynolds number channel flows. *Phys Fluids* 22:081703.
3. Matas JP, Glezer V, Guazzelli E, Morris JF (2004) Trains of particles in finite-Reynolds-number pipe flow. *Phys Fluids* 16:4192.

4. Hur SC, Tse HTK, Di Carlo D (2010) Sheathless inertial cell ordering for extreme throughput flow cytometry. *Lab Chip* 10:274–280.
5. Lee W, Amini H, Stone HA, Di Carlo D (2010) Microfluidic crystals: Self-assembly and control of particle streams. *Proc Natl Acad Sci* 107:22413–22418.
6. Di Carlo D (2009) Inertial microfluidics. *Lab Chip* 9:3038–3046.



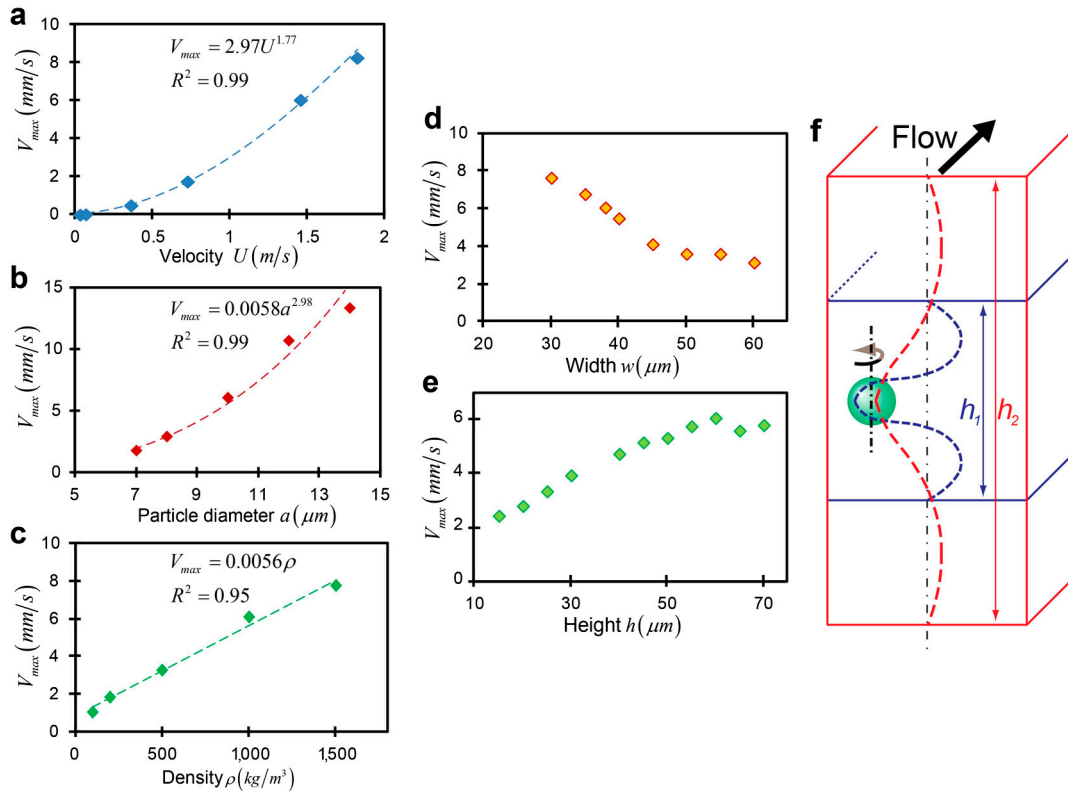

**Fig. 54.** Scaling of the transverse transport velocity ( $V_{max}$ ) with dimensional parameters and a schematic of transport for different channel heights. Particles are simulated occupying inertial focusing positions along the channel width. Except for one variable in each graph, the system parameters are as follows:  $w = 38 \mu\text{m}$ ,  $h = 60 \mu\text{m}$ ,  $a = 10 \mu\text{m}$ ,  $Q = 200 \mu\text{L}/\text{min}$ ,  $\rho = 1,000 \text{ kg}/\text{m}^3$ ,  $\mu = 0.001 \text{ Pa}\cdot\text{s}$ , and the particle is laterally located at its focusing position. (A) Transverse velocity has a best fit with  $U^{1.77}$ . This scaling is consistent with the importance of the inertia of the fluid around the particle. (B) There is a significant dependence on particle size, approximately  $a^3$ . The strong effect of the particle size is consistent with the amount of fluid transferred around the particle scaling with particle volume. (C) The relation between the transport and the density appears linear. (D) With increasing width and a channel height of  $60 \mu\text{m}$ , the transfer decreases until it saturates for low aspect ratio channels. (E) With increasing height at a fixed channel width of  $38 \mu\text{m}$ , the transfer increases until it saturates for high aspect ratios. (F) These results are consistent with the argument that when the system has a short height ( $h_1$ ) compared to width it is constrained to have return flows, satisfying conservation of mass in close proximity to the generating flow around the particle. Thus, the return flow compresses the generating flow and eliminates a portion of the potential transfer. However, for taller heights ( $h_2$ ), the return flows are able to extend in the  $z$  direction, allowing for full transfer to occur. Note that confinement in the velocity gradient direction (width) leads to a stronger effect than channel height ( $V_{max}$  varies by a factor of 3 compared to 1.5 for a twofold change in dimension).





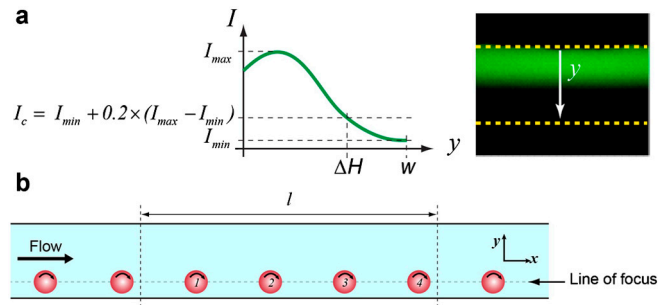

**Fig. 58.** Definition of transport factor ( $TF$ ) and length fraction ( $\phi$ ). (A) The intensity profile at the point of interest along the channel is first extracted. Critical intensity is calculated as  $I_c = 0.2(I_{max} - I_{min}) + I_{min}$  and then used to define  $TF$  as  $2 \times (\Delta H/w - 0.5)$ , with  $\Delta H/w$  being the extent of the channel cross-section in which the intensity is greater than  $I_c$ . (B) Length fraction  $\phi$  is essentially a measure of particle concentration in the channel. It is defined as the fraction of the channel length that is occupied by particles. Equivalently,  $\phi = \sum a_i/l$ . It is preferred to represent the concentration of the particles in channel flow as length fraction, rather than the conventional volumetric concentration  $V_f$ , because it provides a more comprehensive description of how many particles are positioned to disturb the flow. This parameter is more relevant than the volume fraction because, for the cases tested, particles over the whole channel volume are focused to a single focal stream. Therefore, increasing the channel dimensions while maintaining the same volume fraction is expected to counterintuitively lead to different transport rates as the increased number of particles from the increased channel volume are focused to the same stream. The relationship between length fraction and volume fraction is  $\phi = 6whV_f/\pi a^2$ . Note that due to the relative lengths of the system, a large  $\phi$  might correspond to a moderate  $V_f$ . For instance,  $\phi = 25\%$  in our channels ( $w_{stream} = 19 \mu\text{m}$ ,  $h = 60 \mu\text{m}$ ,  $a = 10 \mu\text{m}$ ) corresponds to  $V_f = 1.148\%$ .

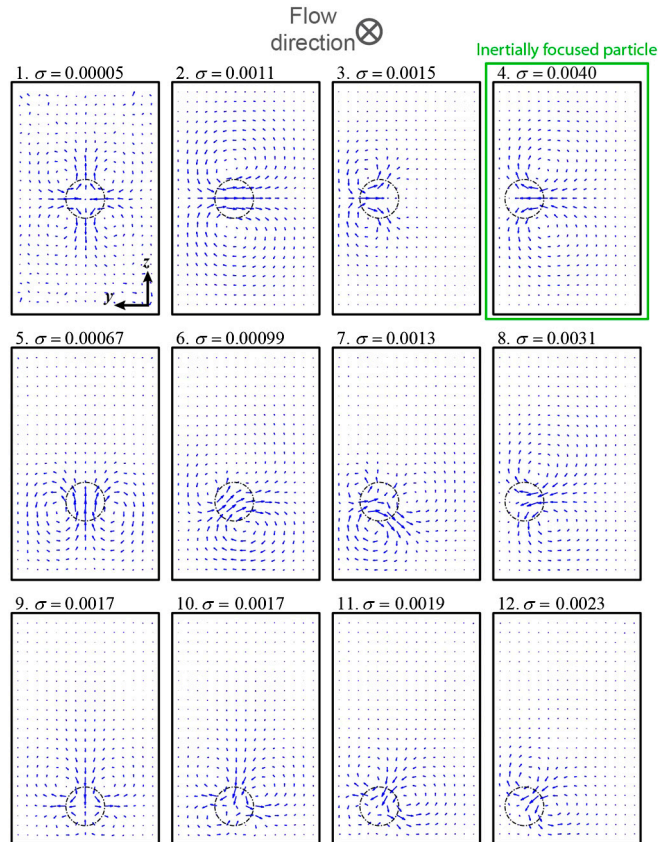

**Fig. 59.** The cross-sectional position of the drag- and torque-free particle in the channel affects the secondary flow created. A slight change in the position of the particle from its focusing position in the  $y$  direction results in full reversal of the secondary flow (compare cases 3 and 4). Displacement in the  $z$  direction creates additional complexity in the shape and direction of the secondary flows. For instance, three secondary flows exist in case 7. This shows that even when the particles are flowing on the same half of the channel, the secondary flows they induce might not be in-phase and that slight displacement of the particle from its focusing position might result in a set of secondary flows that are deconstructive (compared to inertially focused particles).
